# Supplementary material
Source: PubMed Central journal article supplement (PMC10210262)
Supplement: 12889_2023_15781_MOESM1_ESM.pdf [file 12889_2023_15781_MOESM1_ESM.pdf]

Workplace Encouragement for COVID-19 Vaccination in Chicago  
(The WEVax Chicago Study)Â

CDPH is studying how businesses encourage or require COVID-19 vaccination among employees, and what we can do to support these efforts.

Please help us by completing this brief survey.  
Results will be shared in Fall of 2022.

All responses will be summarized in aggregate.  
No businesses will be named when we present our findings  
For questions/comments, contact workplaceCOVID@cityofchicago.org.

Please have this information at hand to help you complete the survey, if possible:

- workforce vaccination status  
(number or estimated percentage of employees vaccinated)
  
- workforce demographics (optional)  
(primary languages spoken, estimated breakdown by race and ethnicity groups)

Submission Date \_\_\_\_\_

**Business (Workplace) Characteristics**

Business Name \_\_\_\_\_ Respondent Name \_\_\_\_\_  
 Business Address \_\_\_\_\_  
 (OK to leave blank, if describing employees at multiple locations in Chicago) \_\_\_\_\_ Respondent Title  
 (job title) \_\_\_\_\_  
 Business City \_\_\_\_\_ Respondent Phone Number \_\_\_\_\_  
 Business Zipcode \_\_\_\_\_ Respondent E-mail Address \_\_\_\_\_

How would you describe your primary type of business or industry?

\_\_\_\_\_  
(For example: construction, restaurant, food processing, grocery store)

Please choose from one of the following options before describing the number and vaccination status of your employees:

- Our business has multiple locations. My answers describe employees who report to one of these locations
- Our business has multiple locations. My answers describe employees who report to multiple locations, combined
- Our business has one location

Approximately how many full-time employees are in this workplace? \_\_\_\_\_

Approximately how many part-time, contract, and/or temporary employees are in this workplace? \_\_\_\_\_

Approximately what percent of your full-time employees are off-site or teleworking?

- 0%
- 1-25%
- 26-50%
- 51-75%
- 76-99%
- 100% (all employees)
- Our workplace doesn't have full-time employees

Approximately what percent of your part-time/contract employees are off-site or teleworking?

- 0%
- 1-25%
- 26-50%
- 51-75%
- 76-99%
- 100% (all employees)
- Our workplace doesn't have these types of employees

Does your workplace require employees to be fully-vaccinated against COVID-19 and/or boosted, if eligible?

- Yes, fully vaccinated (primary series)
- Yes, fully vaccinated and boosted as eligible
- No vaccination requirement
- Unsure

Does your workplace check employees' COVID-19 vaccination status?

- Yes, for primary series (full vaccination)
- Yes, for primary series and boosters
- Our workplace does not check employees' vaccination status
- Unsure

If yes, how do you verify COVID-19 vaccination status?

\_\_\_\_\_

Approximately when was this policy last implemented?

\_\_\_\_\_  
((Estimate using month/year, or provide other details if needed))

How would you like to report vaccination status of your full-time workforce?

- I can estimate the number of full-time employees who have been vaccinated
- I prefer to estimate a percentage of full-time employees who have been vaccinated
- Our workplace doesn't have full-time employees
- I cannot estimate the number or percentage of these employees who are vaccinated (I don't know)

How many of your full-time employees have completed their primary vaccination series?

\_\_\_\_\_

How many of your full-time employees have received a booster shot?

\_\_\_\_\_

0%      1-25%      26-50%      51-75%      76-99%      100% (all employees)      Don't know

Approximately what percentage of your full-time workforce has received their primary series (is fully-vaccinated)?

Approximately what percentage of your full-time workforce has received any booster shots?

How would you like to report vaccination status of your part-time or other employees who are not full-time?

I can estimate the number of part-time/other employees who have been vaccinated  
 I prefer to estimate a percentage of part-time/other employees who have been vaccinated  
 Our workplace doesn't have these other types of employees  
 I cannot estimate the number or percentage of these employees who are vaccinated (I don't know)

How many of your part-time/contract/temporary employees have received a booster shot?

\_\_\_\_\_

(leave blank, if you do not have these types of staff.)

How many of your part-time/contract/temporary employees have completed their primary vaccination series?

\_\_\_\_\_

(leave blank, if you do not have these types of staff.)

|                                                                                                                         | 0%                    | 1-25%                 | 26-50%                | 51-75%                | 76-99%                | 100% (all employees)  | Don't know            |
|-------------------------------------------------------------------------------------------------------------------------|-----------------------|-----------------------|-----------------------|-----------------------|-----------------------|-----------------------|-----------------------|
| Approximately what percentage of your part-time/other workforce has received their primary series (is fully-vaccinated) | <input type="radio"/> | <input type="radio"/> | <input type="radio"/> | <input type="radio"/> | <input type="radio"/> | <input type="radio"/> | <input type="radio"/> |
| Approximately what percentage of your part-time/other workforce has received any booster shots                          | <input type="radio"/> | <input type="radio"/> | <input type="radio"/> | <input type="radio"/> | <input type="radio"/> | <input type="radio"/> | <input type="radio"/> |

**Please indicate whether your workplace has ever used each strategy to encourage COVID-19 vaccination among employees.**

**In the dropdown options, "primary series" refers to the doses recommended for individuals to be considered "fully-vaccinated" against COVID-19. As of July 2022, this includes:**

- 2 doses of Pfizer-BioNTech given 3-8 weeks apart**
- 2 doses of Moderna given 4-8 weeks apart**
- 1 dose of Johnson & Johnson's Janssen**

For Full-Time Staff  
 Choose 'Not Applicable'  
 if you do not have full-time staff  
 For Part-Time Staff  
 Choose 'Not Applicable'  
 if you do not have part-time or other types of staff

Offering vaccine on-site (in the workplace) \_\_\_\_\_  
 Paid time off for receiving COVID-19 vaccinations \_\_\_\_\_  
 Paid time off for recovering from side effects after receipt of COVID-19 vaccinations \_\_\_\_\_  
 Monetary incentive (bonus) for receipt of COVID-19 vaccination \_\_\_\_\_  
 Other incentive for receipt of COVID-19 vaccination \_\_\_\_\_  
 Social media, internal communications, posters or signage around the workplace to encourage COVID-19 vaccination

Training for interested staff to become COVID-19 vaccination ambassadors, share personal stories about the vaccine with fellow co-workers, address concerns \_\_\_\_\_  
 Townhalls or other opportunities for leadership, respected local medical experts, and staff to share their COVID-19 vaccine experience, facts about the vaccine \_\_\_\_\_

If your workplace has used other strategies to encourage COVID-19 vaccination among workers, please describe them here: \_\_\_\_\_

We want to hear about challenges workplaces have experienced regarding requiring, enforcing, or encouraging vaccination among employees. Please share any details about these topics here: \_\_\_\_\_

CDPH may follow-up with businesses about support for COVID-19 vaccination among workers. Would your business like to be contacted about these topics?

- Yes, we would be willing to participate in a short, individual follow-up call with CDPH about these topics
- Yes, we would be willing to participate in a focus group with other businesses about these topics
- We would be interested in attending a webinar or seminar about these topics
- We do not wish to participate in a follow-up discussion about these topics  
(Please check all that apply.)

Would you like to receive a copy of the survey findings when available? (the e-mail address you entered at the beginning of this survey will be used)

- Yes, please send us a summary of the results from this survey when they are available.

Employee (Workforce) Demographics

**Approximately what percent of your workforce identifies as each of these race-ethnicity groups? (Optional)**

0%      1-25%      26-50%      51-75%      76-99%      100% (all employees)      Don't know

|                                                                            |                       |                       |                       |                       |                       |                       |                       |
|----------------------------------------------------------------------------|-----------------------|-----------------------|-----------------------|-----------------------|-----------------------|-----------------------|-----------------------|
| Latinx (including those who identify as Latinx AND another race/ethnicity) | <input type="radio"/> | <input type="radio"/> | <input type="radio"/> | <input type="radio"/> | <input type="radio"/> | <input type="radio"/> | <input type="radio"/> |
| Black, non-Latinx                                                          | <input type="radio"/> | <input type="radio"/> | <input type="radio"/> | <input type="radio"/> | <input type="radio"/> | <input type="radio"/> | <input type="radio"/> |
| White, non-Latinx                                                          | <input type="radio"/> | <input type="radio"/> | <input type="radio"/> | <input type="radio"/> | <input type="radio"/> | <input type="radio"/> | <input type="radio"/> |
| Asian, non-Latinx                                                          | <input type="radio"/> | <input type="radio"/> | <input type="radio"/> | <input type="radio"/> | <input type="radio"/> | <input type="radio"/> | <input type="radio"/> |
| Other, non-Latinx (includes more than one race, but not Latinx at all)     | <input type="radio"/> | <input type="radio"/> | <input type="radio"/> | <input type="radio"/> | <input type="radio"/> | <input type="radio"/> | <input type="radio"/> |

---

Primary language(s) spoken by employees

- English
- Spanish
- Polish
- Arabic
- Chinese (including Mandarin and Cantonese)
- Tagalog
- Other

(Check all that apply.)

---

If other, please specify \_\_\_\_\_

---

Does your workplace offer health insurance for employees?

- Yes, for full-time employees
- Yes, for part-time, temporary and/or contract employees
- Yes, for both full-time and part-time employees
- Yes, with another arrangement
- No
- Unknown

---

Please use this space for other details you wish to share about health insurance offered to employees of your workplace \_\_\_\_\_
