# Supplementary material
Source: PubMed Central journal article supplement (PMC10210262)
Supplement: 12889_2023_15781_MOESM4_ESM.pdf [file 12889_2023_15781_MOESM4_ESM.pdf]

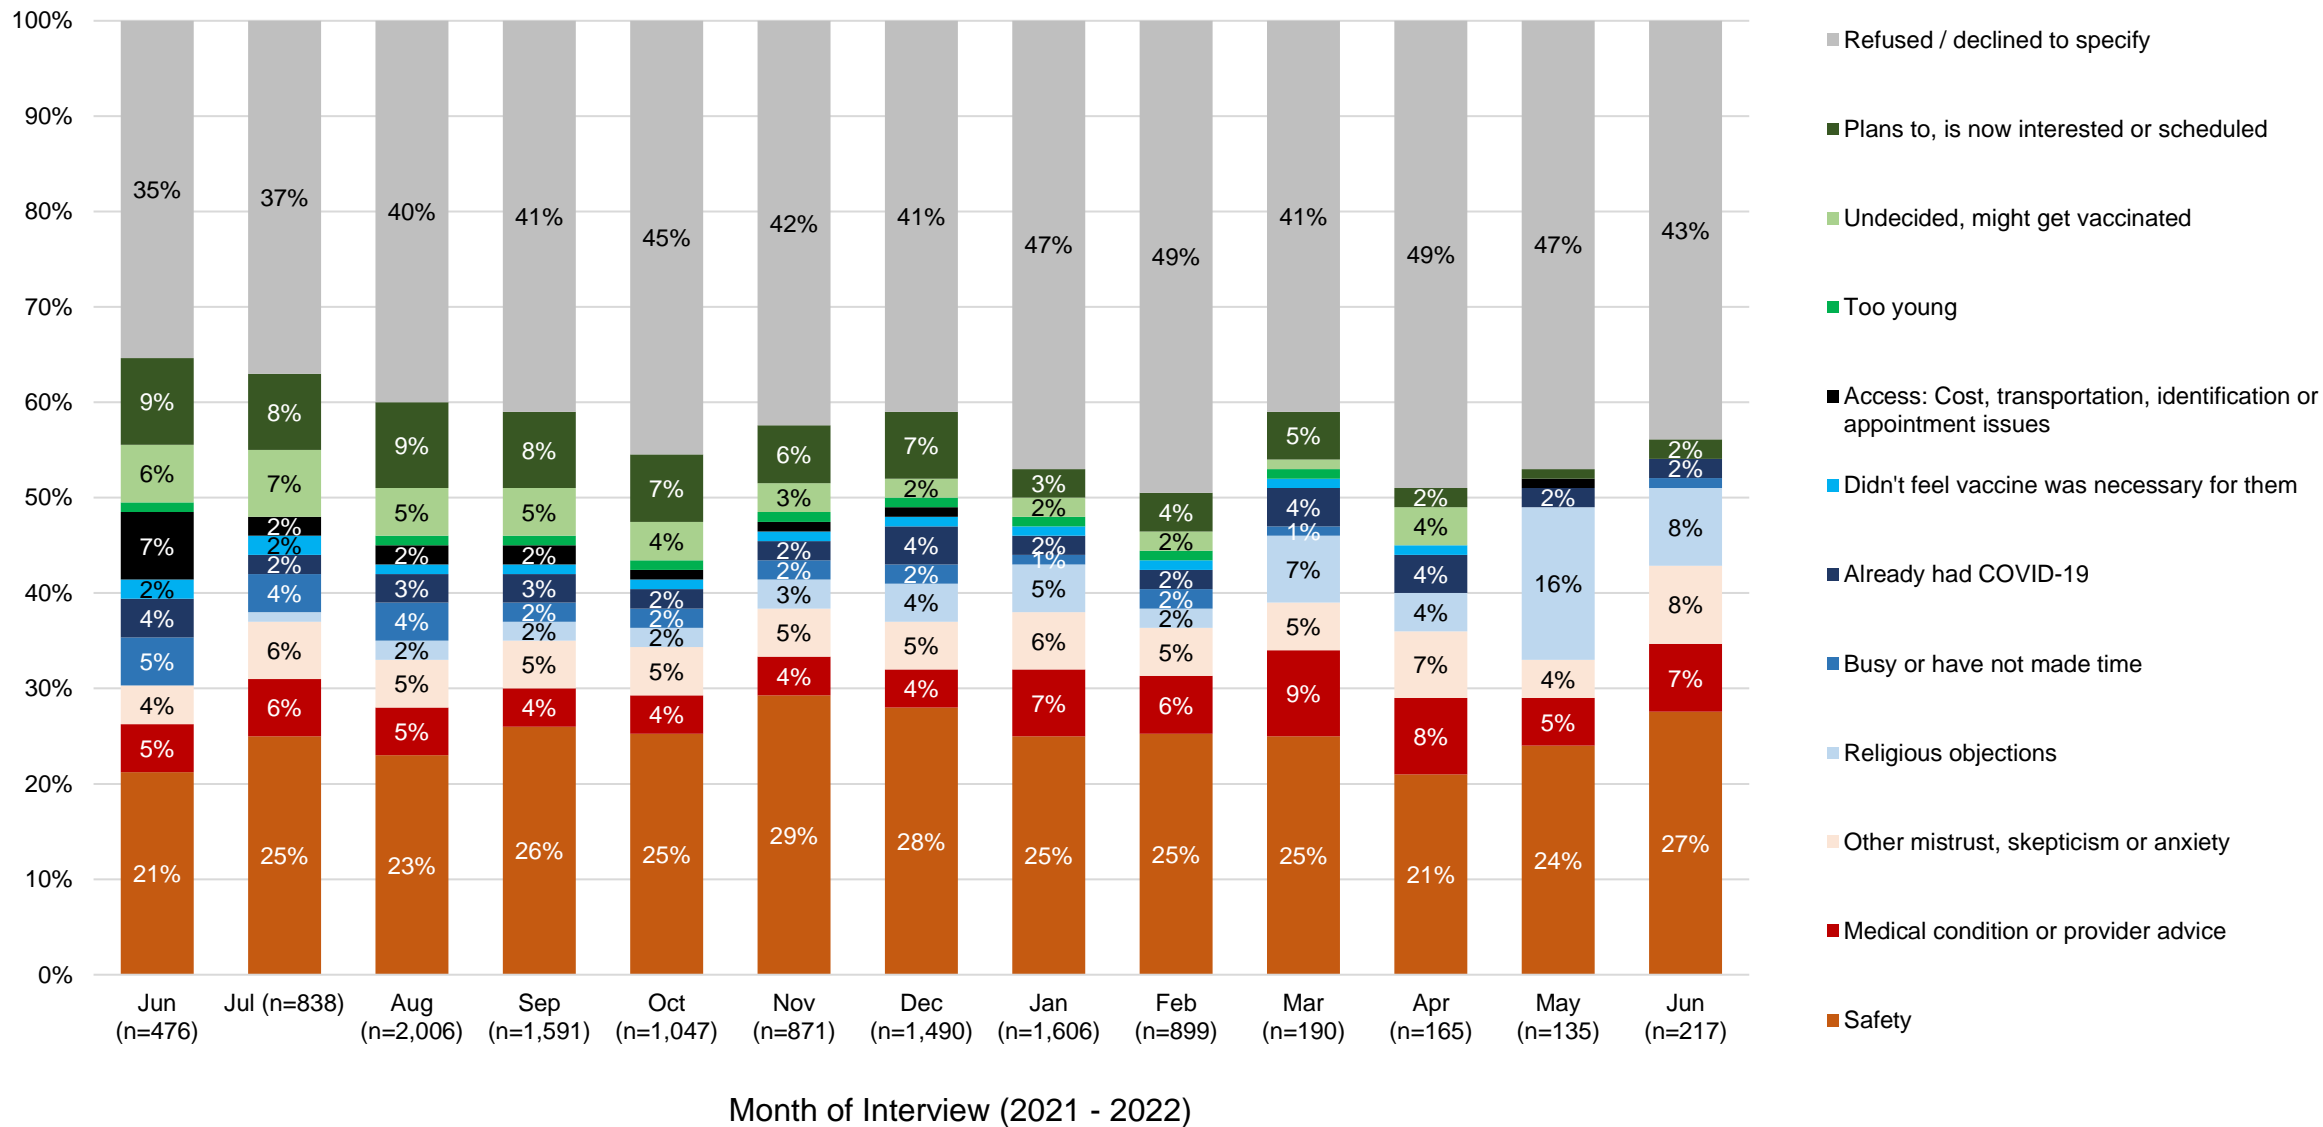

\*Frequencies <2% not labeled

Supplemental Figure 1. Primary Reasons for Not Initiating COVID-19 Vaccination among Unvaccinated Working-Age Chicagoans Interviewed June 1, 2021 – May 31, 2022 (n=9,925)\*
